# Supplementary material for: A novel synthetic method for backbone-cyclized polypeptide POL7080 with the help of hydrophobic-support materials
Source: Royal Society of Chemistry journal article supplement (doi:10.1039/d3ob01670f), 2023-12-04
Supplement: d3ob01670f1.pdf [file d3ob01670f1.pdf]

Table S1. POL7080 with its minimum inhibitory concentration against Gram-positive and negative strains.

| Compounds                        | MIC: µg/mL                                |                                          |                                                |                                            |                                             |
|----------------------------------|-------------------------------------------|------------------------------------------|------------------------------------------------|--------------------------------------------|---------------------------------------------|
|                                  | <sup>a</sup> <i>P. aeruginosa</i><br>POA1 | <sup>b</sup> <i>E. coli</i><br>ATCC25922 | <sup>c</sup> <i>P. aeruginosa</i><br>ATCC27853 | <sup>d</sup> <i>S. aureus</i><br>ATCC25923 | <sup>e</sup> <i>B. subtilis</i><br>ATCC9372 |
| <b>POL7080</b> <sub>sample</sub> | 0.25                                      | ≥128                                     | 0.25                                           | 128                                        | 64                                          |
| <b>CIP</b> <sup>f</sup>          | ≤0.25                                     | ≤0.25                                    | 1                                              | ≤0.25                                      | 0.5                                         |
| <b>VAN</b> <sup>g</sup>          | >128                                      | 128                                      | >128                                           | 0.5                                        | 1                                           |

<sup>a</sup>*P. aeruginosa* PAO1: *Pseudomonas aeruginosa* CGMCC 1.12483, wild type strain;

<sup>b</sup>*E. coli* ATCC25922: *Escherichia coli* ATCC2592, penicillin-susceptible strain;<sup>2</sup>

<sup>c</sup>*P. aeruginosa* ATCC27853: *Pseudomonas aeruginosa* ATCC27853, penicillin-susceptible strain, not characterized.

<sup>d</sup>*S. aureus* ATCC25923: *Staphylococcus aureus* ATCC25923, erythromycin-susceptible strain;

<sup>e</sup>*B. subtilis* ATCC9372: *Bacillus subtilis* ATCC9372, penicillin-susceptible strain;

<sup>f</sup>CIP: ciprofloxacin (Adamas life, China); <sup>g</sup>VAN: vancomycin(Meryer, China).
